# Supplementary material for: Preparation of new microporous europium silicate molecular sieve by selective leaching of alkali metal cations from europium silicate Eu-AV-9
Source: Royal Society of Chemistry journal article supplement (doi:10.1039/d2dt02608b), 2022-01-01
Supplement: d2dt02608b1.pdf [file d2dt02608b1.pdf]

## Electronic Supplementary Information

### Preparation of New Microporous Europium Silicate Molecular Sieve by Selective Leaching of Alkali Metal Cations of Europium Silicate Eu-AV-9

Hiroki Noda,<sup>a</sup> Masakazu Koike,<sup>a,b</sup> Rika Sakai,<sup>a</sup> Hiroaki Wada,<sup>a,b</sup> Atsushi Shimojima,<sup>\*a,b</sup> and Kazuyuki Kuroda<sup>\*a,b</sup>

a. *Department of Applied Chemistry, Faculty of Science and Engineering, Waseda University, 3-4-1 Okubo, Shinjuku-ku, Tokyo 169-8555, Japan.*

b. *Kagami Memorial Research Institute for Materials Science and Technology, Waseda University, 2-8-26 Nishiwaseda, Shinjuku-ku, Tokyo 169-0051, Japan.*

\*E-mail : shimojima@waseda.jp  
kuroda@waseda.jp

## Table of contents

|                                                                                                                                                                                                                         |     |
|-------------------------------------------------------------------------------------------------------------------------------------------------------------------------------------------------------------------------|-----|
| Experimental Details .....                                                                                                                                                                                              | S3  |
| Analysis of the reagent $\text{EuCl}_3 \cdot 6\text{H}_2\text{O}$ .....                                                                                                                                                 | S3  |
| Data.....                                                                                                                                                                                                               | S3  |
| Figure S1 $\text{N}_2$ adsorption-desorption isotherms of Eu-AV-9. ....                                                                                                                                                 | S3  |
| Figure S2 Powder XRD pattern and the Rietveld refinement of Eu-AV-9.....                                                                                                                                                | S4  |
| Figure S3 TG-DTA curves of Eu-AV-9 (top: TG curve, bottom: DTA curve). ....                                                                                                                                             | S4  |
| Figure S4 SEM images of Eu-AV-9.....                                                                                                                                                                                    | S5  |
| Figure S5 Eu 4d XPS profiles of a) Eu-AV-9, b) Ac1-Eu-AV-9, and c) Ac14-Eu-AV-9. S5                                                                                                                                     |     |
| Figure S6 Eu 4d XPS spectrum of $\text{EuCl}_3 \cdot 6\text{H}_2\text{O}$ . ....                                                                                                                                        | S6  |
| Figure S7 FT-IR spectra of a) Eu-AV-9, b) Ac1-Eu-AV-9 and c) Ac14-Eu-AV-9. ....                                                                                                                                         | S6  |
| Figure S8 STEM-EDS mapping images of Eu-AV-9. ....                                                                                                                                                                      | S7  |
| Figure S9 TEM image and ED pattern of the sample treated for 14 d of acid treatment at the higher acetic acid concentration (ED pattern was obtained from the area shown by the white dot circle in the TEM image)..... | S7  |
| Figure S10 PDF analysis of (a) Eu-AV-9 and (b) Ac14-Eu-AV-9. ....                                                                                                                                                       | S8  |
| Figure S11 SEM images of Ac1-Eu-AV-9.....                                                                                                                                                                               | S8  |
| Figure S12 SEM images of Ac14-Eu-AV-9.....                                                                                                                                                                              | S9  |
| Figure S13 STEM-EDS mapping images of Ac14-Eu-AV-9. ....                                                                                                                                                                | S9  |
| Figure S14 TG-DTA curves of Ac1-Eu-AV-9 (top: TG curve, bottom: DTA curve)....                                                                                                                                          | S10 |
| Figure S15 TG-DTA curves of Ac14-Eu-AV-9 (top: TG curve, bottom: DTA curve)..                                                                                                                                           | S10 |
| Figure S16 Powder XRD patterns of calcined Ac14-Eu-AV-9 ((a) 200 °C, (b) 300 °C).<br>.....                                                                                                                              | S11 |
| Figure S17 Si 2p XPS profiles of a) Eu-AV-9, b) Ac1-Eu-AV-9, and c) Ac14-Eu-AV-9.<br>.....                                                                                                                              | S11 |
| Figure S18 O 1s XPS profiles of a) Eu-AV-9, b) Ac1-Eu-AV-9, and c) Ac14-Eu-AV-9.<br>.....                                                                                                                               | S12 |
| Figure S19 Ar adsorption-desorption isotherms of (a) Eu-AV-9 (black), (b) Ac1-Eu-AV-9 (red) and (c) Ac14-Eu-AV-9 (blue). Open circles indicate adsorption and closed circles indicate desorption.....                   | S12 |
| Figure S20 Location of hydrated $\text{H}_2\text{O}$ molecules in Eu-AV-9.....                                                                                                                                          | S13 |
| Table S1 ICP analysis data of filtrate after acetic acid treatment of Eu-AV-9.....                                                                                                                                      | S13 |
| References .....                                                                                                                                                                                                        | S14 |

## Experimental Details

### Analysis of the reagent $\text{EuCl}_3 \cdot 6\text{H}_2\text{O}$

The XPS spectrum of  $\text{EuCl}_3 \cdot 6\text{H}_2\text{O}$  (Fig. S7) shows that  $\text{EuCl}_3 \cdot 6\text{H}_2\text{O}$  contains 22% of  $\text{Eu}^{2+}$ , though  $\text{Eu}^{2+}$  may be locally distributed. The presence of  $\text{Eu}^{2+}$  in the starting reagent  $\text{EuCl}_3 \cdot 6\text{H}_2\text{O}$  was previously reported.<sup>1</sup> On the other hand, the Cl/Eu ratio estimated by ICP analysis and ion chromatography was determined to be 3, and the value is consistent with the ratio calculated from the chemical formula of  $\text{EuCl}_3 \cdot 6\text{H}_2\text{O}$ . This can be interpreted by assuming that one of the water molecules coordinated to  $\text{Eu}^{2+}$  is  $\text{H}_3\text{O}^+$ ,<sup>2</sup> suggesting that the reagent  $\text{EuCl}_3 \cdot 6\text{H}_2\text{O}$  is composed of 78%  $\text{EuCl}_3 \cdot 6\text{H}_2\text{O}$  and 22%  $\text{EuCl}_3 \cdot 5\text{H}_2\text{O}(\text{H}_3\text{O})$ .

## Data

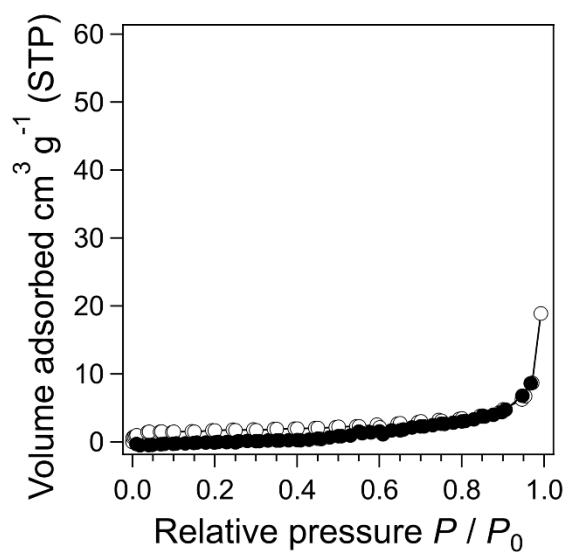

**Figure S1**  $\text{N}_2$  adsorption-desorption isotherms of Eu-AV-9.

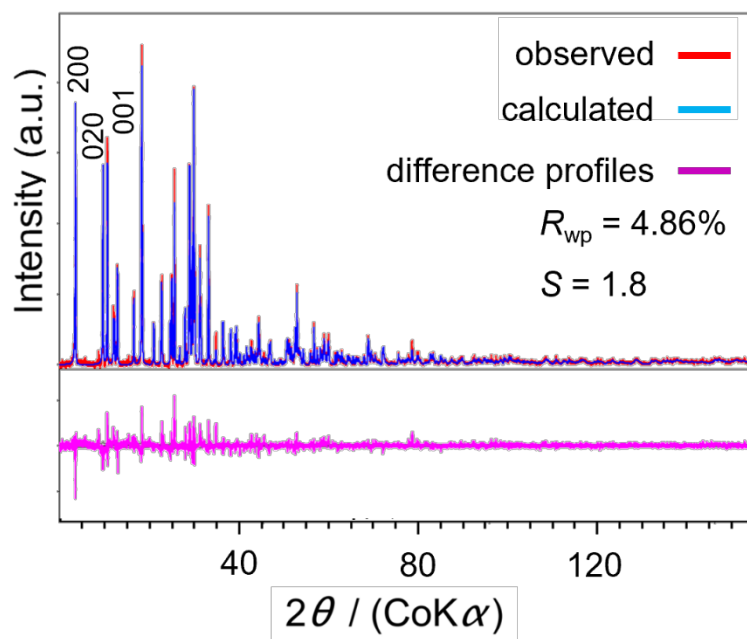

**Figure S2** Powder XRD pattern and the Rietveld refinement of Eu-AV-9.

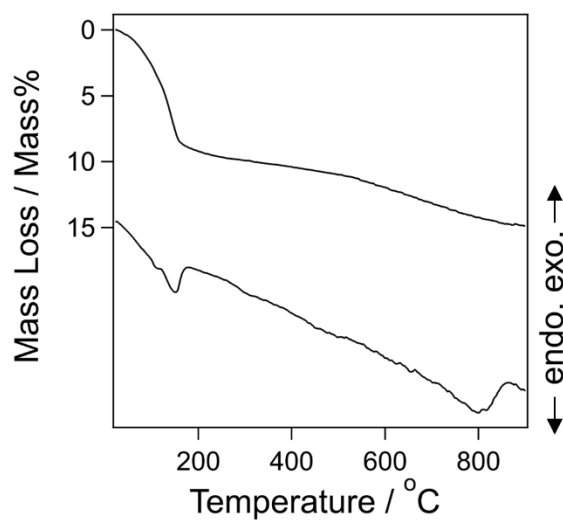

**Figure S3** TG-DTA curves of Eu-AV-9 (top: TG curve, bottom: DTA curve).

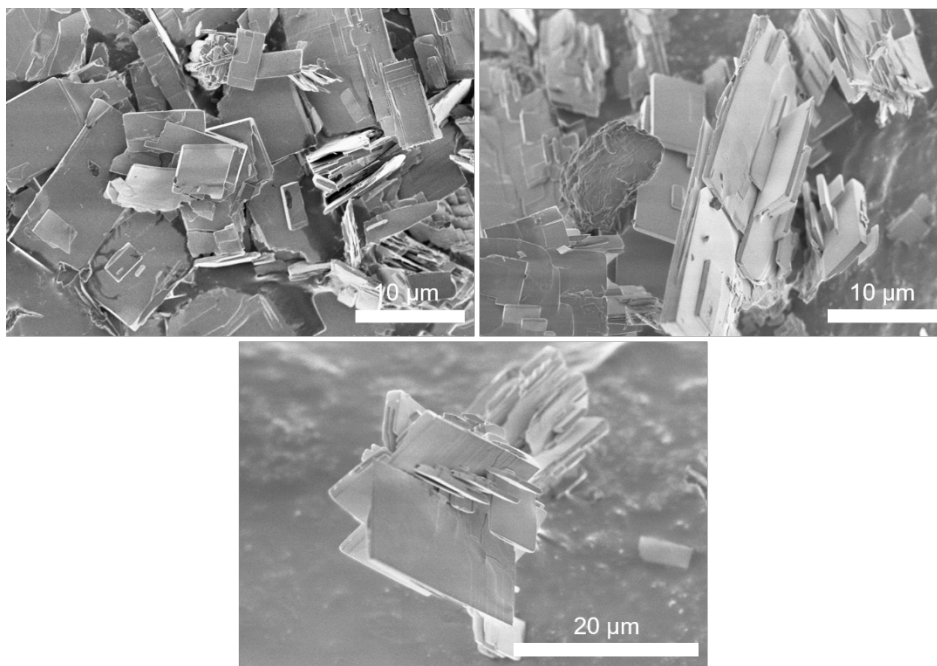

**Figure S4** SEM images of Eu-AV-9.

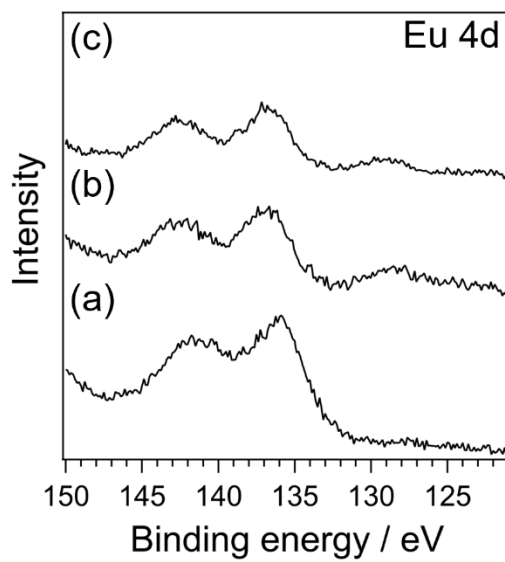

**Figure S5** Eu 4d XPS profiles of a) Eu-AV-9, b) Ac1-Eu-AV-9, and c) Ac14-Eu-AV-9.

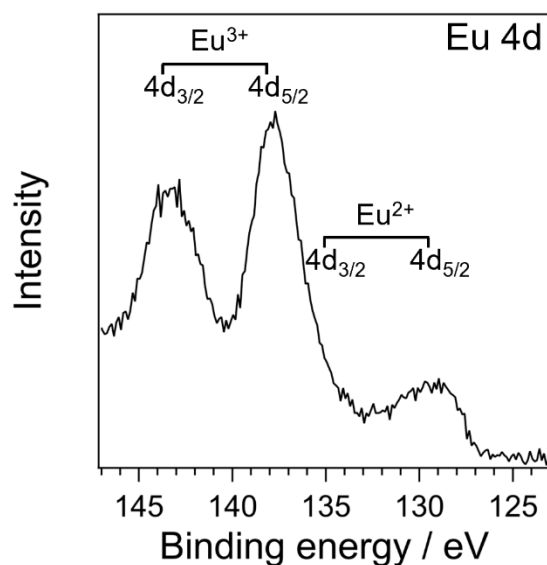

**Figure S6** Eu 4d XPS spectrum of  $\text{EuCl}_3 \cdot 6\text{H}_2\text{O}$ .

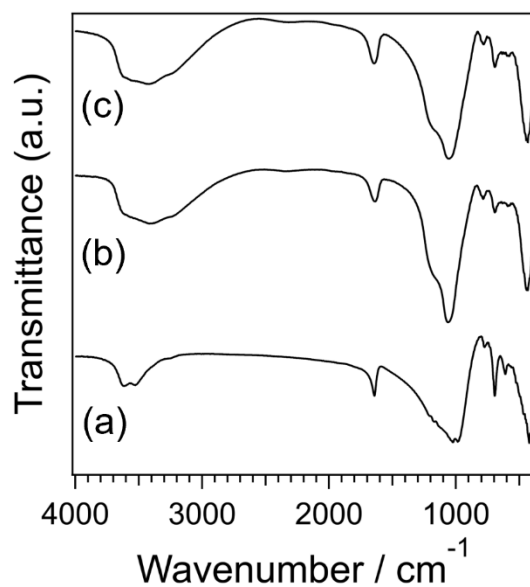

**Figure S7** FT-IR spectra of a) Eu-AV-9, b) Ac1-Eu-AV-9 and c) Ac14-Eu-AV-9. The O–H stretching vibrations were observed around  $3400\text{--}3700\text{ cm}^{-1}$  and H–O–H deformation vibration was observed at  $1640\text{ cm}^{-1}$ , which indicates the presence of hydrated water.<sup>3</sup> The band around  $1000\text{ cm}^{-1}$  was assigned to Si–O–Si (possibly including Si–O–Eu) stretching vibration in Eu-AV-9, Ac1-Eu-AV-9, and Ac14-Eu-AV-9.<sup>4</sup>

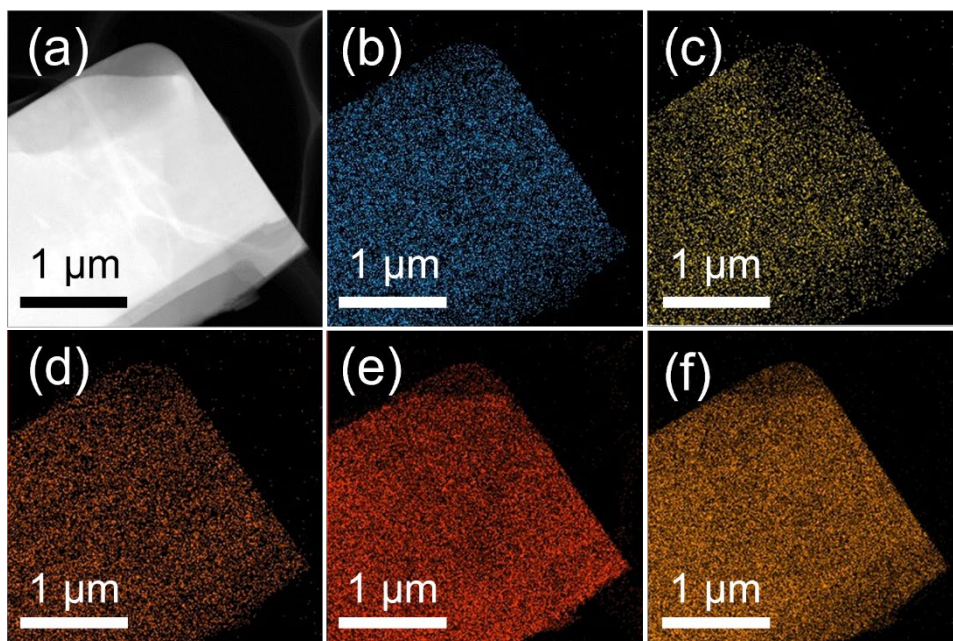

**Figure S8** STEM-EDS mapping images of Eu-AV-9. (a) STEM image, and (b) Eu, (c) K, (d) Na, (e) O, and (f) Si mapping images.

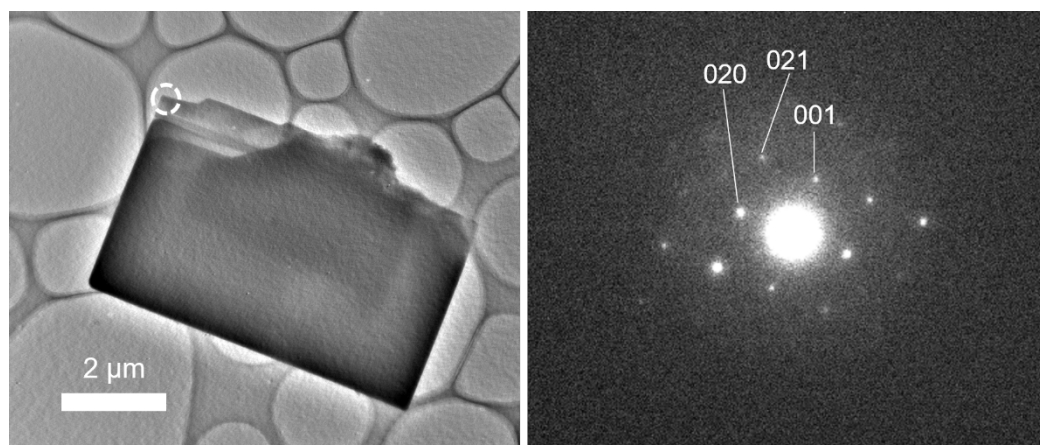

**Figure S9** TEM image and ED pattern of the sample treated for 14 d of acid treatment at the higher acetic acid concentration (ED pattern was obtained from the area shown by the white dot circle in the TEM image).

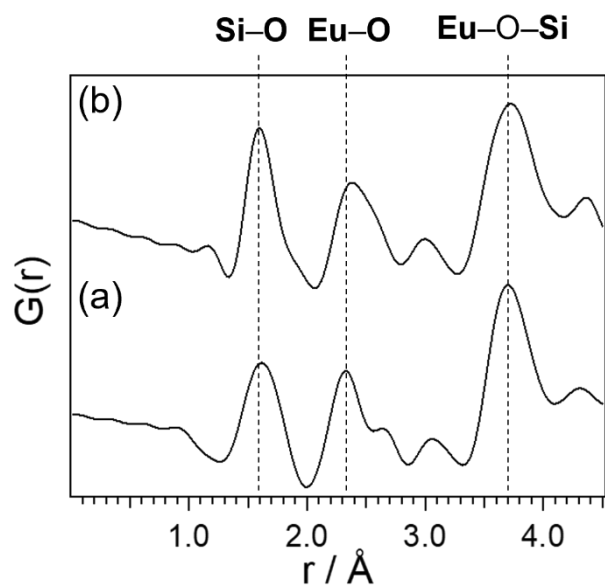

**Figure S10** PDF analysis of (a) Eu-AV-9 and (b) Ac14-Eu-AV-9.

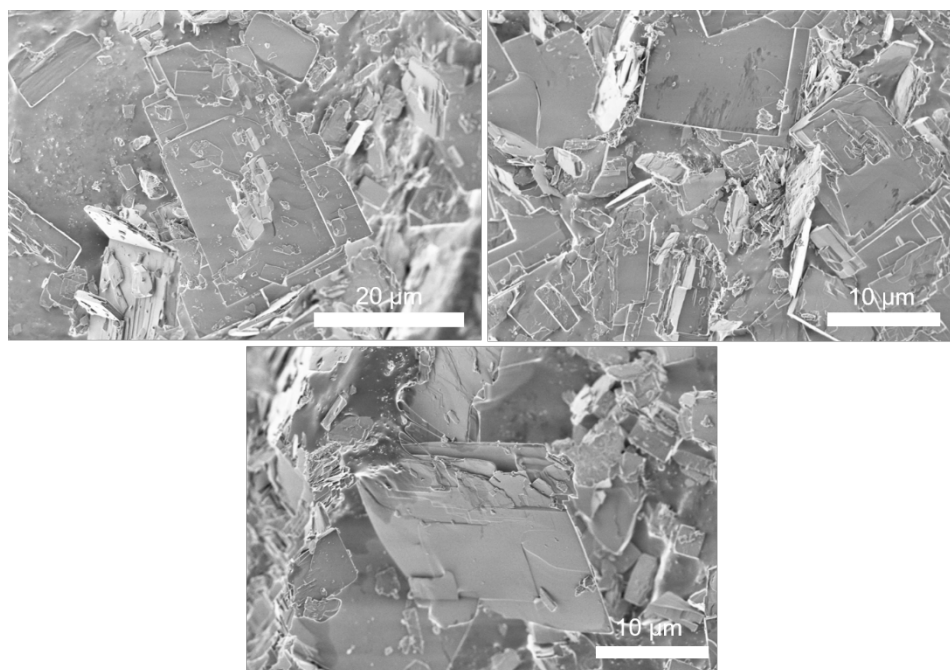

**Figure S11** SEM images of Ac1-Eu-AV-9.



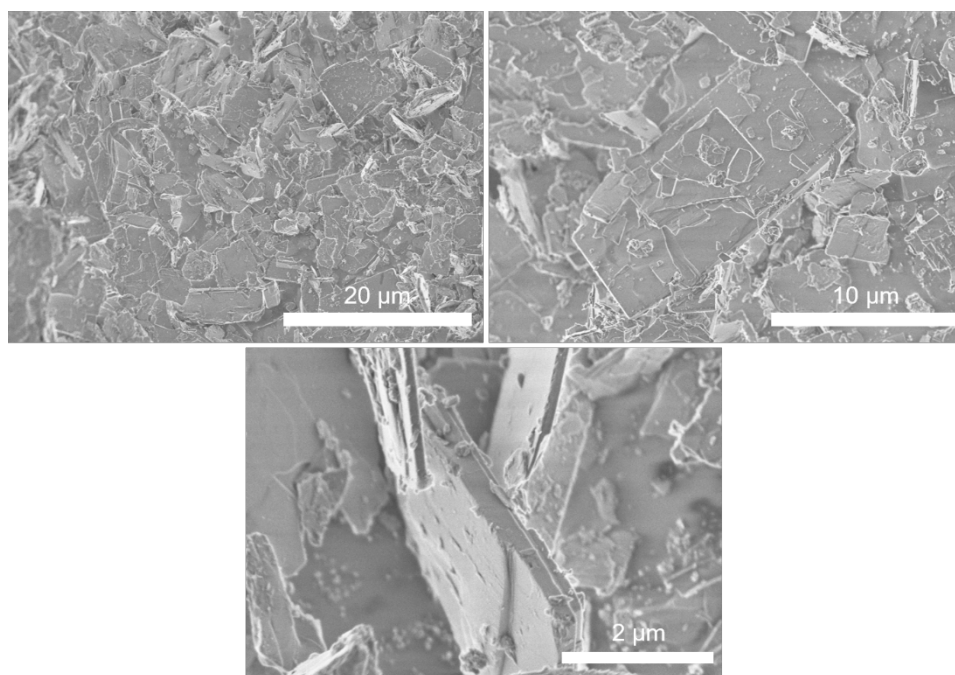

**Figure S12** SEM images of Ac14-Eu-AV-9.

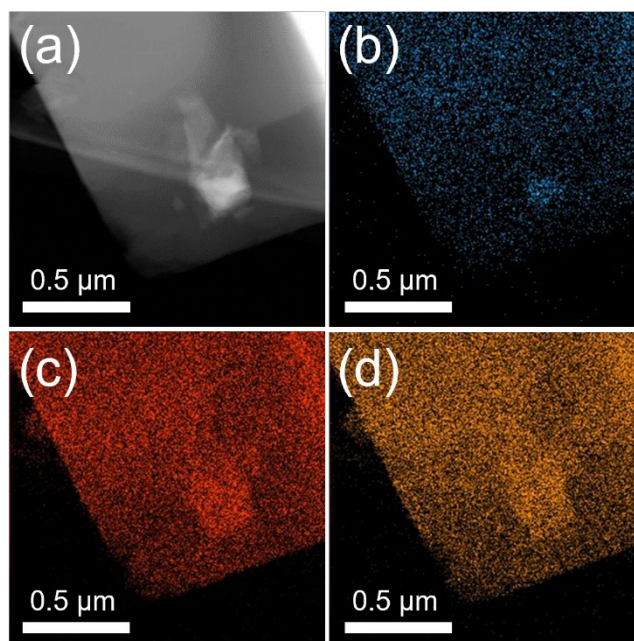

**Figure S13** STEM-EDS mapping images of Ac14-Eu-AV-9. (a) STEM image, and (b) Eu, (c) K, and (d) Na mapping images.

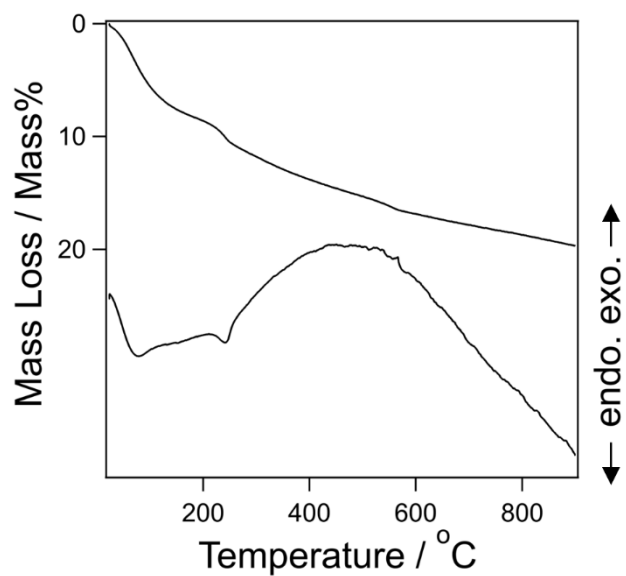

**Figure S14** TG-DTA curves of Ac1-Eu-AV-9 (top: TG curve, bottom: DTA curve).

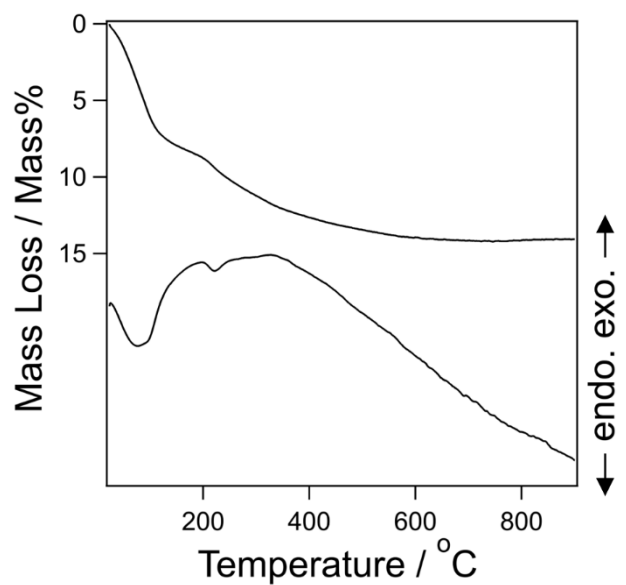

**Figure S15** TG-DTA curves of Ac14-Eu-AV-9 (top: TG curve, bottom: DTA curve).

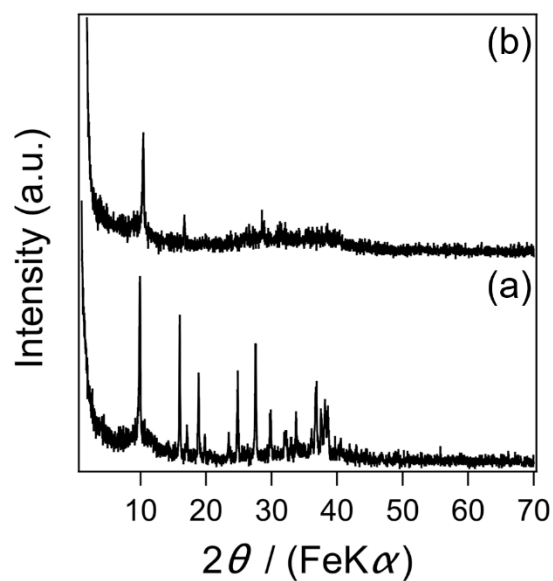

**Figure S16** Powder XRD patterns of calcined Ac14-Eu-AV-9 ((a) 200 °C, (b) 300 °C).

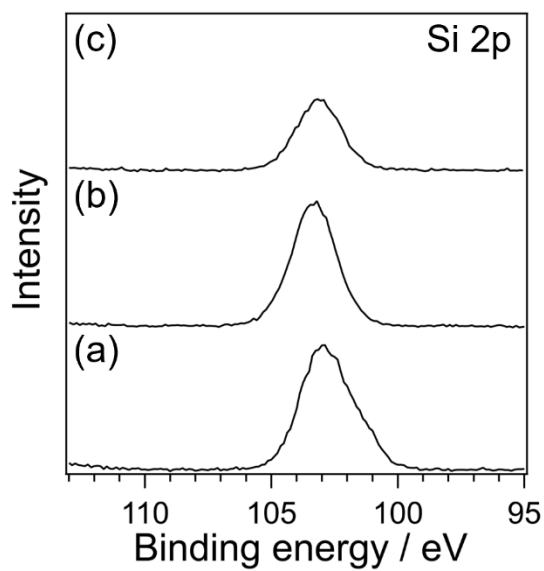

**Figure S17** Si 2p XPS profiles of a) Eu-AV-9, b) Ac1-Eu-AV-9, and c) Ac14-Eu-AV-9.

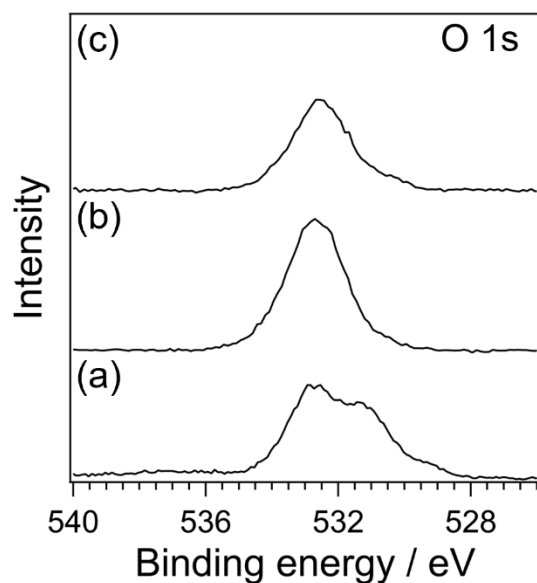

**Figure S18** O 1s XPS profiles of a) Eu-AV-9, b) Ac1-Eu-AV-9, and c) Ac14-Eu-AV-9.

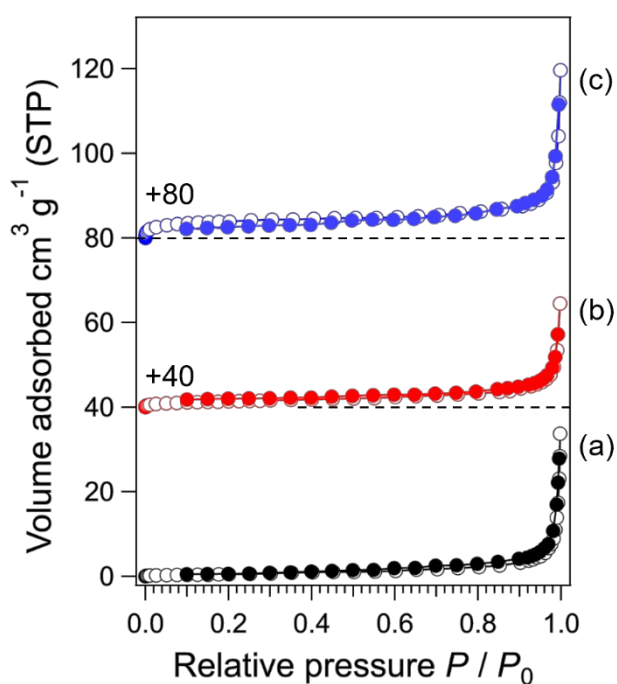

**Figure S19** Ar adsorption-desorption isotherms of (a) Eu-AV-9 (black), (b) Ac1-Eu-AV-9 (red) and (c) Ac14-Eu-AV-9 (blue). Open circles indicate adsorption and closed circles indicate desorption.

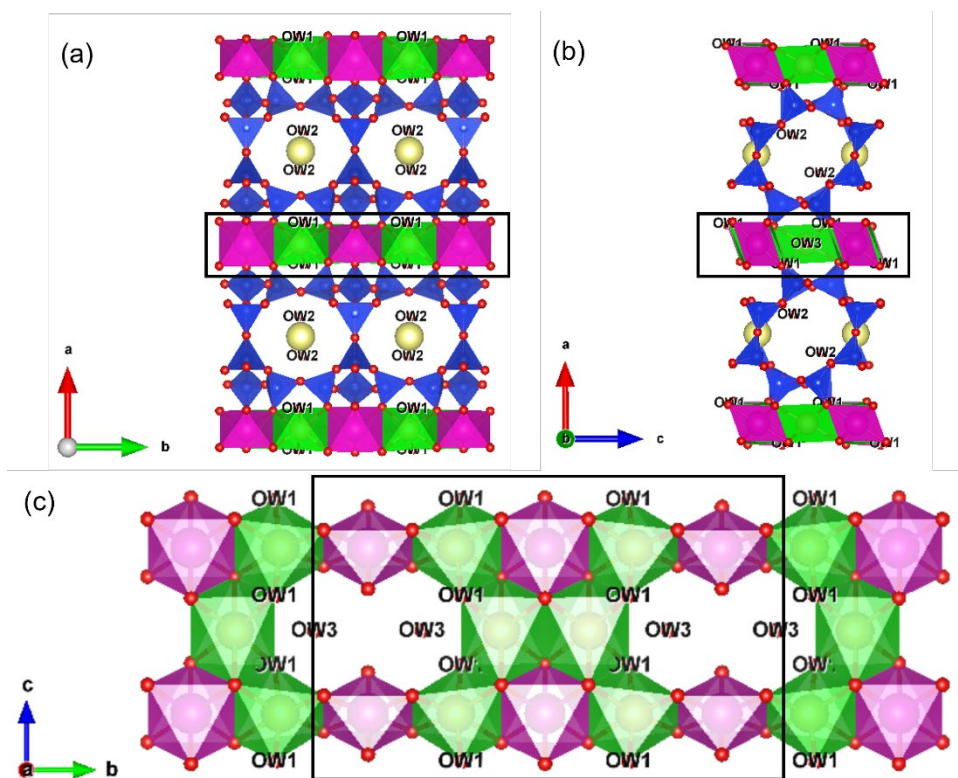

**Figure S20** Location of hydrated H<sub>2</sub>O molecules in Eu-AV-9. Blue, Si; red, O; purple, Eu; green, Na; and yellow, K (Hydrogen atoms of H<sub>2</sub>O molecules are omitted for clarity). The black rectangle in (c) represents the same area as in (a) and (b). Water molecules OW1 and OW2 are coordinated with Na<sup>+</sup> and K<sup>+</sup>, respectively. OW3 are coordinated with OW1. The Crystal structure model of Eu-AV-9 was created using VESTA software.<sup>5</sup>

**Table S1** ICP analysis data of filtrate after acetic acid treatment of Eu-AV-9.

| filtrate | Eu     | Si   |
|----------|--------|------|
|          | /mass% |      |
| Ac1      | 1.5    | 0.11 |
| Ac14     | 6.7    | 0.43 |

## References

- 1 M. G. Silly, S. Blanchandin, F. Sirotti, F. Lux, S. Chevreux, G. Lemerrier, and F. Charra, *J. Phys. Chem. C*, 2013, **117**, 9766.
- 2 J. W. Wen, W. T. Chen, Z. X. Zhang, W. J. Tao, C. Liu, *J. Solid State Chem.*, 2018, **263**, 30.
- 3 J. Rocha, P. Ferreira, Z. Lin, P. Brandão, A. Ferreira, and J. D. Pedrosa de Jesus, *J. Phys. Chem. B*, 1998, **102**, 4739.
- 4 D. Haranath, N. Gandhi, S. Sahai, M. Husain, V. Shanker., *Chem. Phys. Lett.*, 2010, **496**, 100.
- 5 K. Momma and F. Izumi, *J. Appl. Crystallogr.*, 2011, **44**, 1272.
